# Supplementary material for: Reactions of gas-phase uranyl formate/acetate anions: reduction of carboxylate ligands to aldehydes by intra-complex hydride attack
Source: Royal Society of Chemistry journal article supplement (doi:10.1039/d4cp00823e), 2024-01-01
Supplement: d4cp00823e1.pdf [file d4cp00823e1.pdf]

## Supporting Information

### Reactions of Gas-phase Uranyl Formate/Acetate Anions: Intra-complex Hydride Attack to Convert Carboxylates to Aldehydes

Amanda R. Bubas<sup>†</sup>, Irena J. Tatosian, Anna Iacovino<sup>‡</sup> and Michael Van Stipdonk\*

<sup>†</sup>Department of Chemistry and Biochemistry, Duquesne University, 600 Forbes Ave,  
Pittsburgh, PA 15282

#### LIST OF FIGURES

- Figure S1. Electrospray ionization spectrum generated from mix of  $[\text{UO}_2(\text{O}_2\text{C-CH}_3)_2]$  and  $[\text{UO}_2(\text{O}_2\text{C-H})_2]$  in 50:50  $\text{H}_2\text{O}/\text{CH}_3\text{CH}_2\text{OH}$ . Asterisks identify peaks for which acetate is replaced by nitrate, which is a residual species in the capillary of the electrospray ionization source.
- Figure S2. Product ion spectra derived from  $\text{MS}^n$  CID of  $[\text{UO}_2(\text{O}_2\text{C-H})(\text{O}_2\text{C-CD}_3)_2]^-$ : (a) CID ( $\text{MS}/\text{MS}$  stage) of  $[\text{UO}_2(\text{O}_2\text{C-H})(\text{O}_2\text{C-CD}_3)_2]^-$  at  $m/z$  439, (b) CID ( $\text{MS}^3$  stage) of dissociation product ion at  $m/z$  395, (c) CID ( $\text{MS}^4$  stage) of dissociation product ion at  $m/z$  348, and (d) CID ( $\text{MS}^5$  stage) of dissociation product ion at  $m/z$  301. In the spectra, the circles and arrows illustrate the  $\text{MS}^n$  pathway. In each spectrum, the bold peak label indicates the precursor selected for CID while labels in italics represent the products from dissociation or ion-molecule reactions as indicated in the text.
- Figure S3. Product ion spectra derived from  $\text{MS}^n$  CID of  $[\text{UO}_2(\text{O}_2\text{C-H})(\text{O}_2\text{C-CD}_3)_2]^-$  continued: (a) CID ( $\text{MS}^3$  stage) of product ion at  $m/z$  392 generated by initial CID of  $[\text{UO}_2(\text{O}_2\text{C-H})(\text{O}_2\text{C-CD}_3)_2]^-$  at  $m/z$  439, (b) CID ( $\text{MS}^4$  stage) of dissociation product ion at  $m/z$  348. The bold peak labels indicate the precursor selected for CID while labels in italics represent the products from dissociation or ion-molecule reactions as indicated in the text.
- Figure S4. Product ion spectra generated by isolation of ion at  $m/z$  389, without imposed collisional activation, in the ion trap for reaction with  $\text{H}_2\text{O}$  (ca.  $1 \times 10^{-6}$  torr): (a) 1 ms, (b) 10 ms, (c) 100 ms, (d) 1 s and (e) CID of  $m/z$  405 reaction product.
- Figure S5. Product ion spectra generated by isolation of ion at  $m/z$  301 (derived from CID of unlabeled precursor), without imposed collisional activation, in the ion trap for reaction with  $\text{H}_2\text{O}$  (ca.  $1 \times 10^{-6}$  torr): (a) 1 ms, (b) 10 ms, (c) 100 ms and (d) 1 s.
- Figure S6. Product ion spectra generated by isolation of ion at  $m/z$  304 (derived from CID of complex containing  $\text{CD}_3\text{CO}_2\text{H}$ ), without imposed collisional activation, in the ion trap for reaction with  $\text{H}_2\text{O}$  (ca.  $1 \times 10^{-6}$  torr): (a) 1 ms, (b) 10 ms, (c) 100 ms and (d) 1 s.
- Figure S7. Product ion spectra derived from  $\text{MS}^n$  CID of  $[\text{UO}_2(\text{O}_2\text{C-H})_2(\text{O}_2\text{C-CD}_3)]^-$ : (a) CID ( $\text{MS}/\text{MS}$  stage) of  $[\text{UO}_2(\text{O}_2\text{C-H})_2(\text{O}_2\text{C-CD}_3)]^-$  at  $m/z$  422, (b) CID ( $\text{MS}^3$  stage) of dissociation product ion at  $m/z$  378 and (c) CID ( $\text{MS}^4$  stage) of dissociation product ion at  $m/z$  348. In the spectra, the

circles and arrows illustrate the MS<sup>n</sup> pathway. In each spectrum, the bold peak label indicates the precursor selected for CID while labels in italics represent the products from dissociation or ion-molecule reactions as indicated in the text.

Figure S8. Product ion spectra generated by isolation of ion at  $m/z$  375, without imposed collisional activation, in the ion trap for reaction with H<sub>2</sub>O (ca.  $1 \times 10^{-6}$  torr): (a) 1 ms, (b) 10 ms, (c) 100 ms, (d) 1 s and (e) CID of  $m/z$  391 reaction product.

Figure S9. Relevant minima and transition state structures for the dissociation of [UO<sub>2</sub>(H)(O<sub>2</sub>C-H)<sub>2</sub>]<sup>-</sup>.

Figure S10. The relevant minima and transition state structures for the dissociation of [UO<sub>2</sub>(H)(O<sub>2</sub>C-CH<sub>3</sub>)<sub>2</sub>]<sup>-</sup>.

Figure S11. A reaction energy diagram for CID of [UO<sub>2</sub>(H)(O<sub>2</sub>C-CH<sub>3</sub>)<sub>2</sub>]<sup>-</sup>.

Figure S12. The relevant minima and transition state structures for the dissociation of [UO<sub>2</sub>(H)(O<sub>2</sub>C-CH<sub>3</sub>)(O<sub>2</sub>C-H)]<sup>-</sup>.

Figure S13. Relevant minima and transition state structures for the reactions of [UO<sub>2</sub>(O)(CH<sub>3</sub>)]<sup>-</sup> with H<sub>2</sub>O.

## LIST OF TABLES

Table S1. The zero-point corrected electronic energies and free energies for minima and transition states for intra-complex hydride attack during CID of [UO<sub>2</sub>(H)(O<sub>2</sub>C-H)<sub>2</sub>]<sup>-</sup>.

Table S2. The zero-point corrected electronic energies and free energies for minima and transition states for intra-complex hydride attack during CID of [UO<sub>2</sub>(H)(O<sub>2</sub>C-CH<sub>3</sub>)<sub>2</sub>]<sup>-</sup>.

Table S3. The zero-point corrected electronic energies and free energies for minima and transition states for intra-complex hydride attack during CID of [UO<sub>2</sub>(H)(O<sub>2</sub>C-CH<sub>3</sub>)(O<sub>2</sub>C-H)]<sup>-</sup>.

Table S4. The zero-point corrected electronic energies and free energies for minima and transition states for reaction of [UO<sub>2</sub>(O)(CH<sub>3</sub>)]<sup>-</sup> with H<sub>2</sub>O.

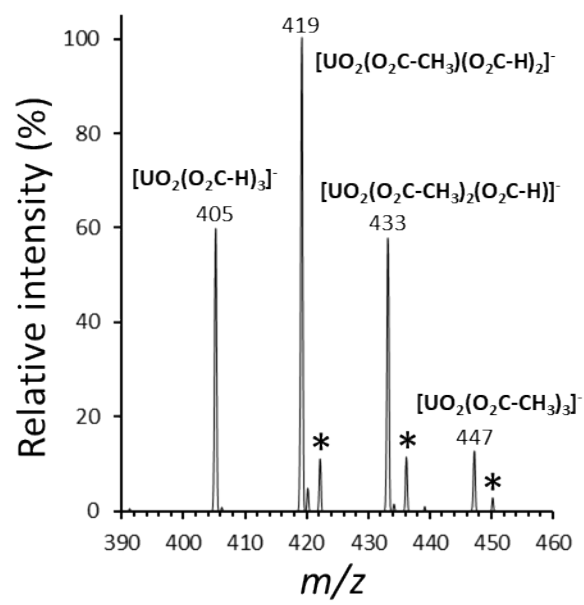

Figure S1.

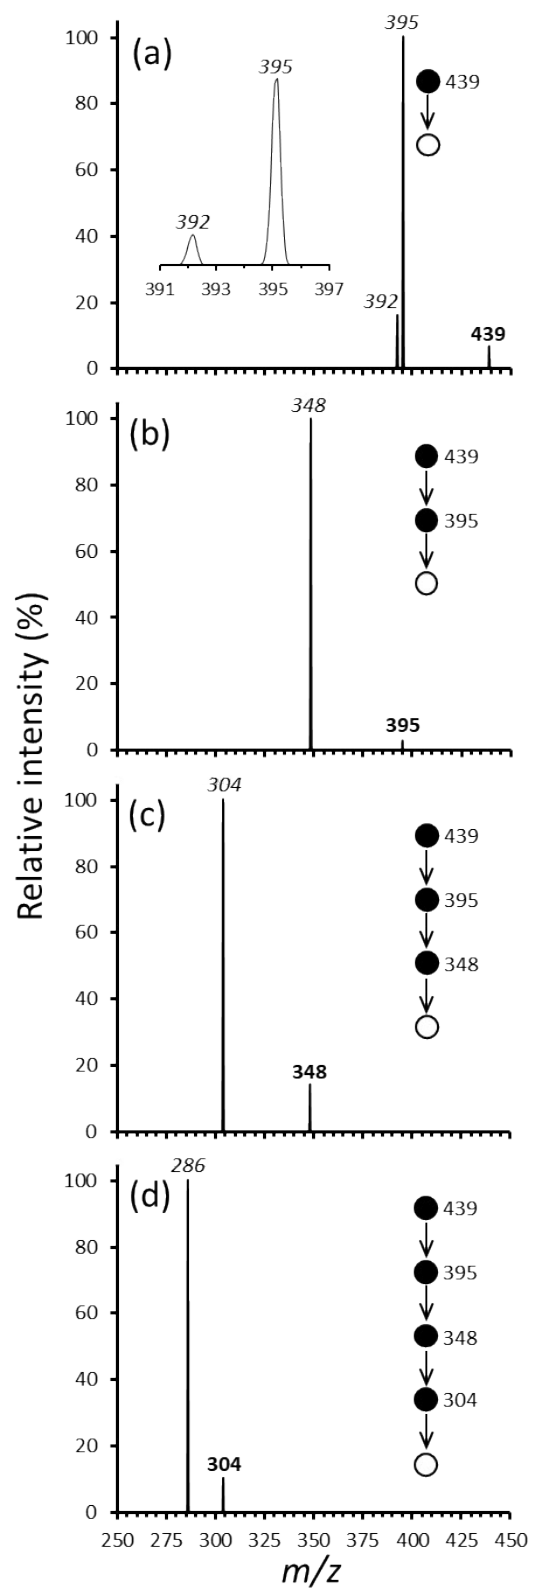

Figure S2.

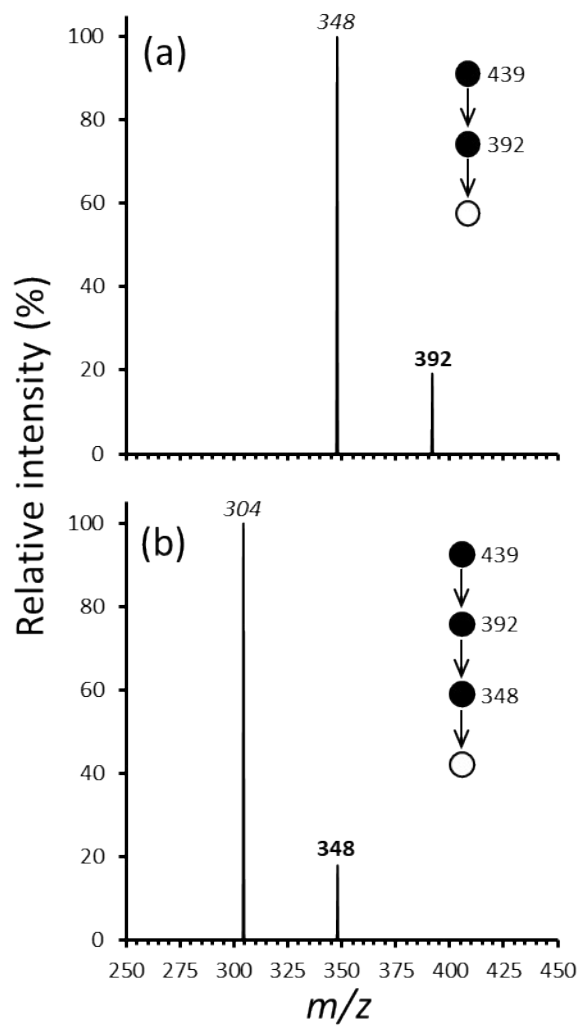

Figure S3.

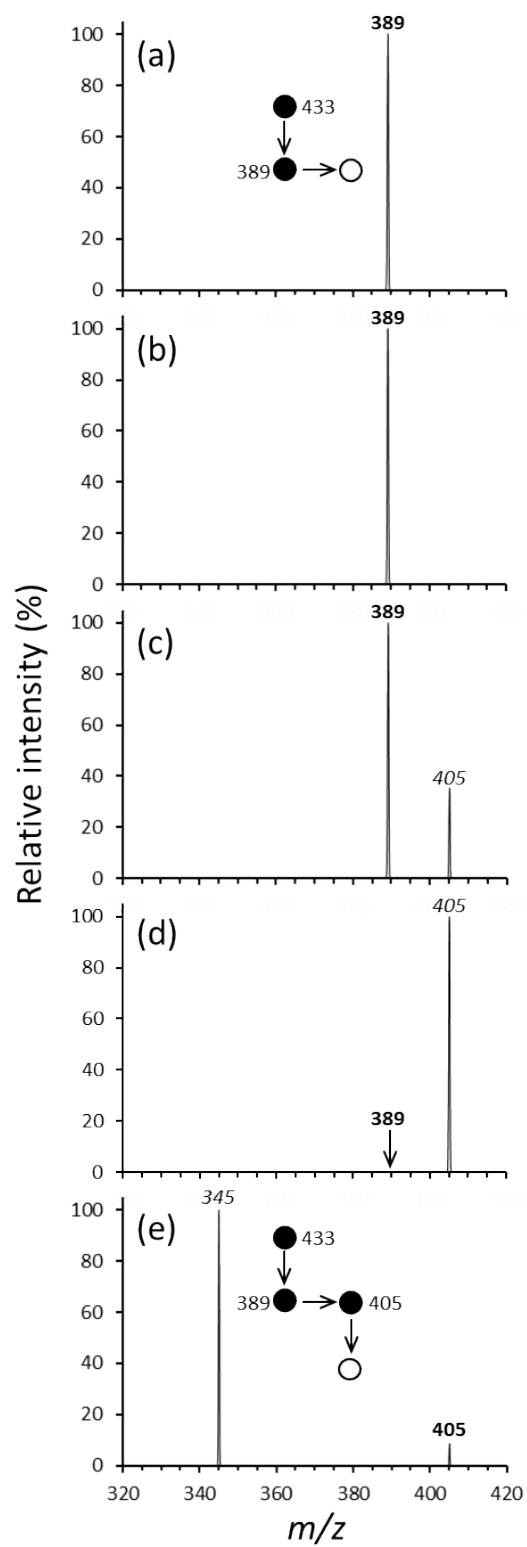

Figure S4.

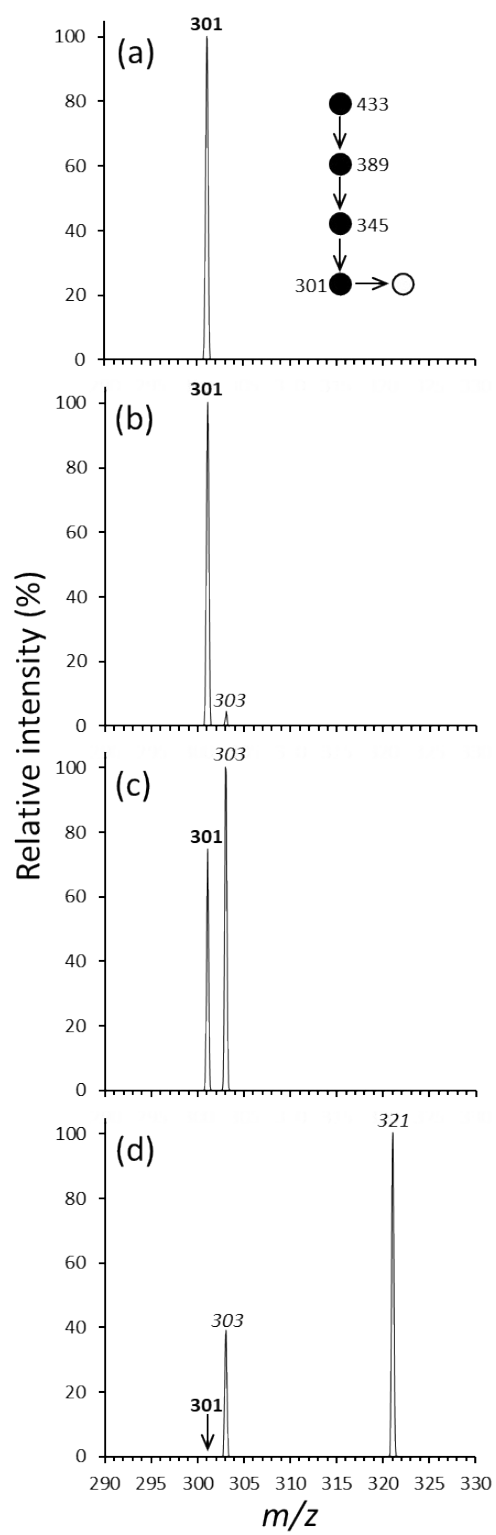

Figure S5.

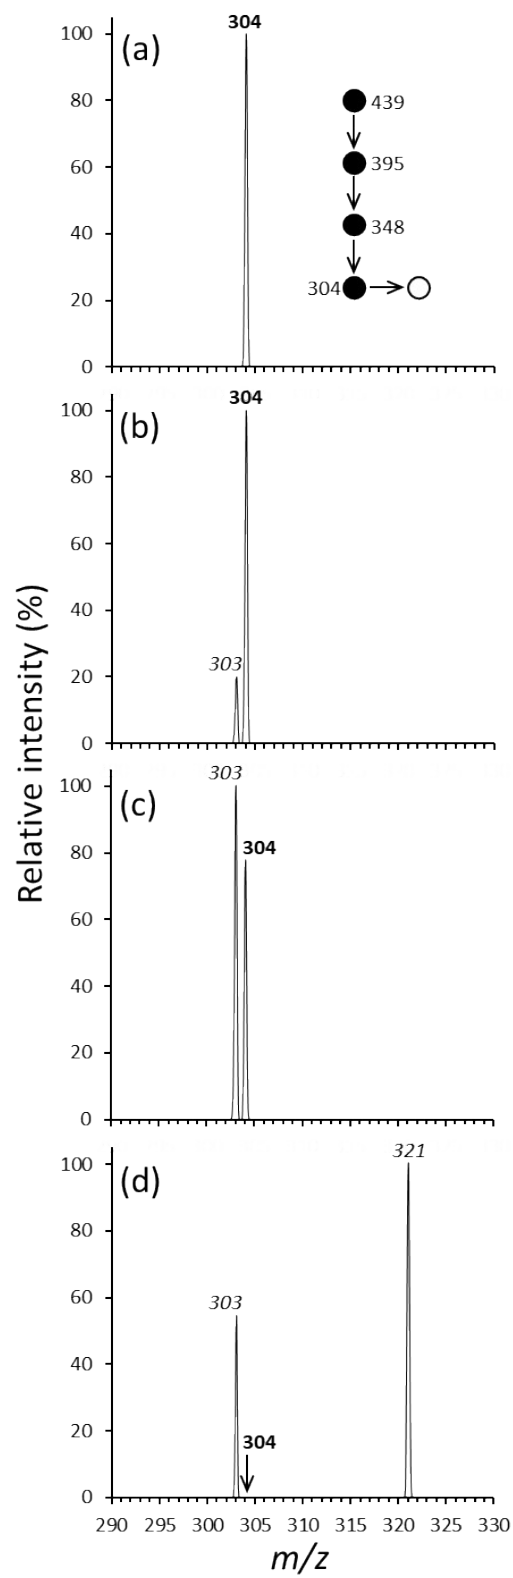

Figure S6.



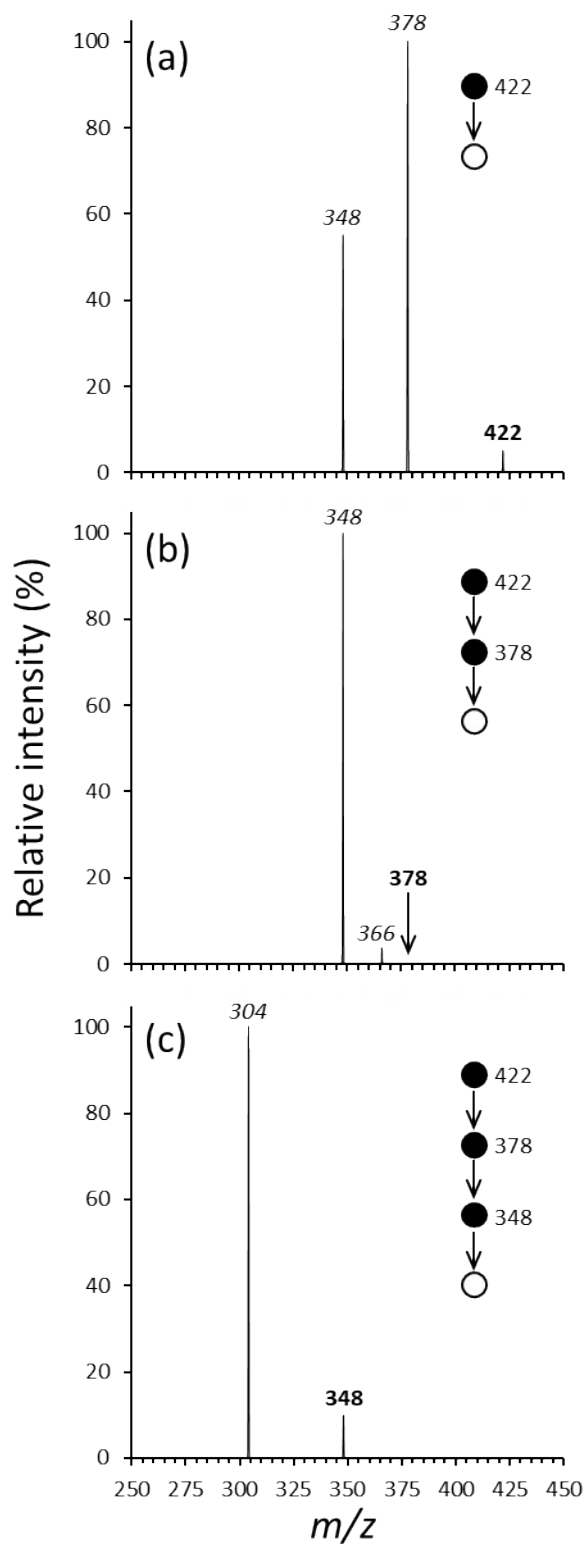

Figure S7.

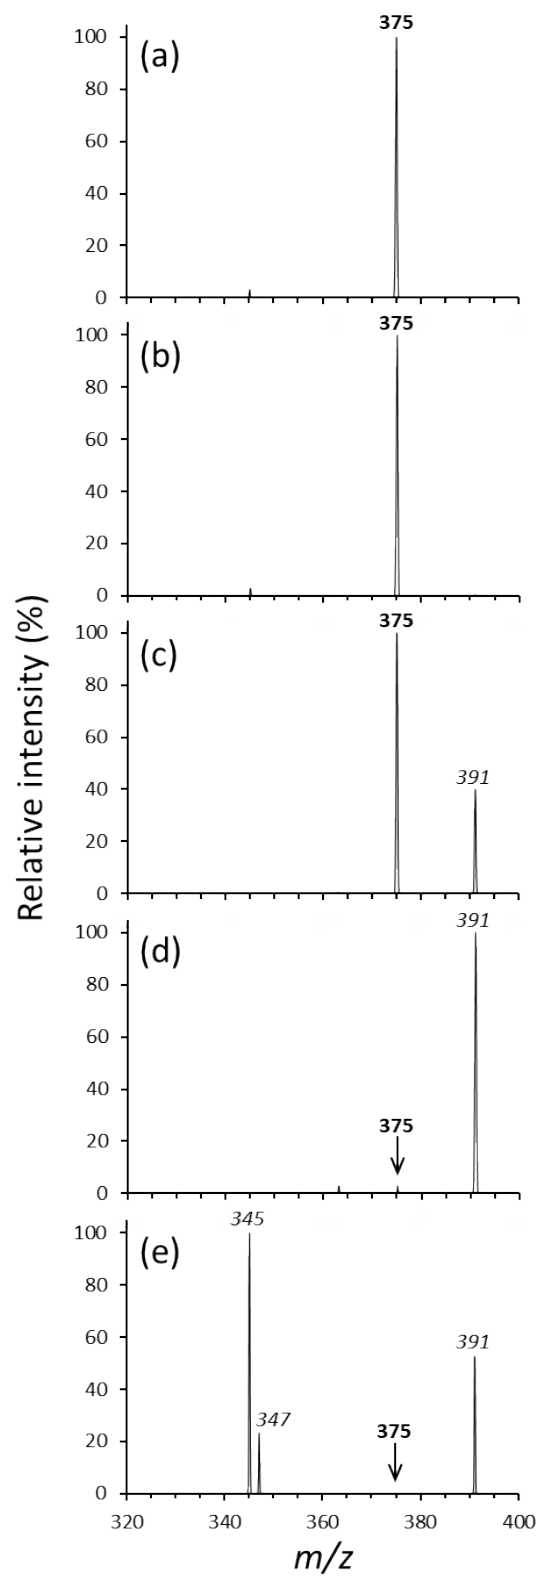

Figure S8.

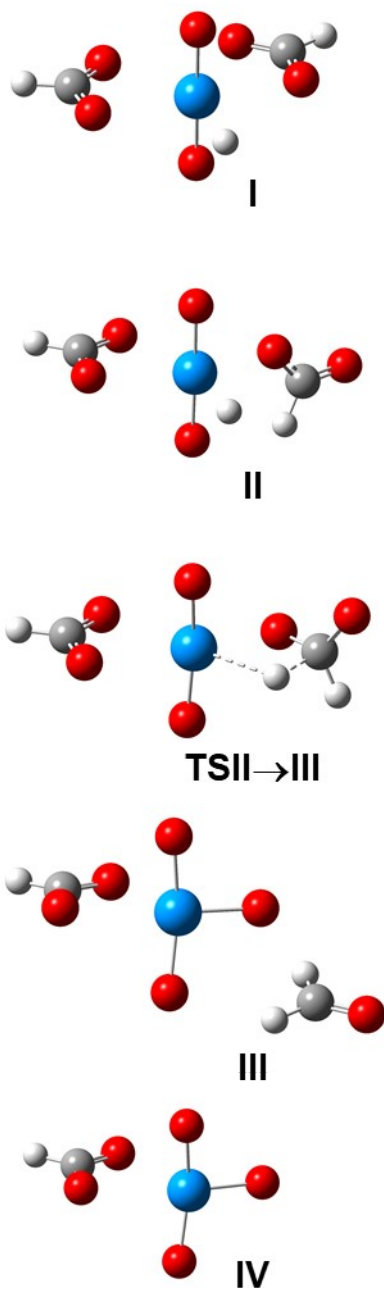

Figure S9.

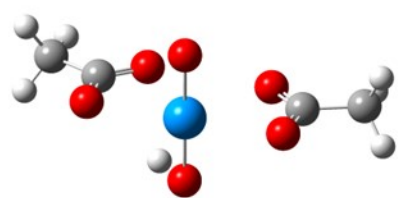

**I-ac**

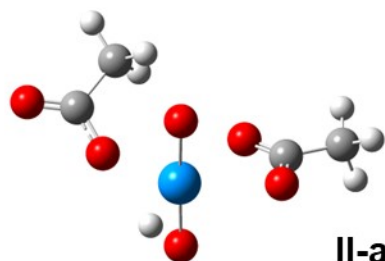

**II-ac**

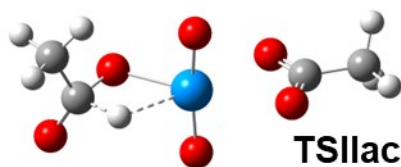

**TSIIac→IIIac**

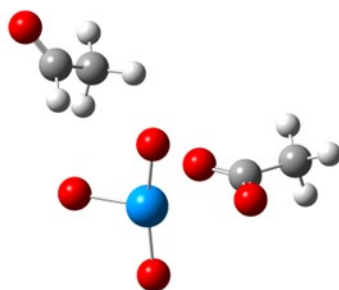

**III-ac**

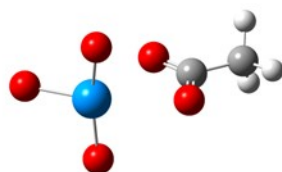

**IV-ac**

Figure S10.

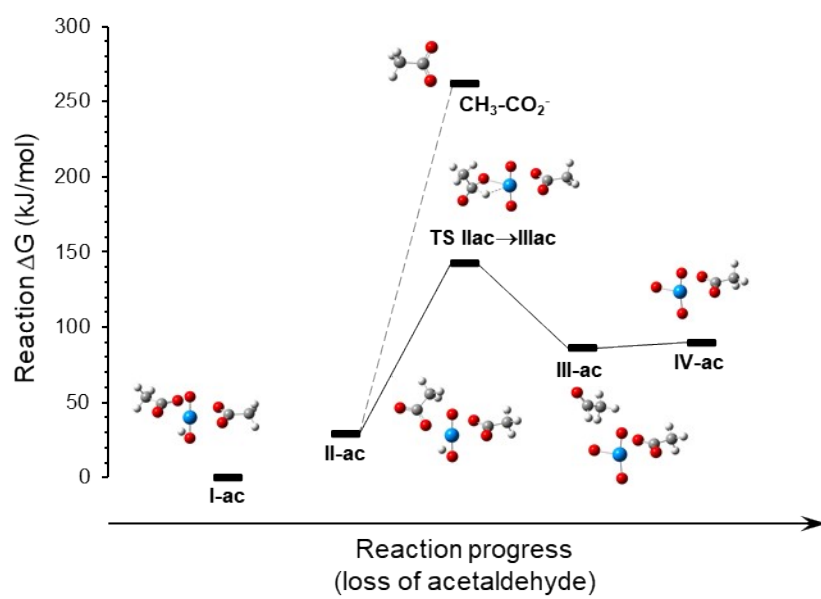

Figure S11.

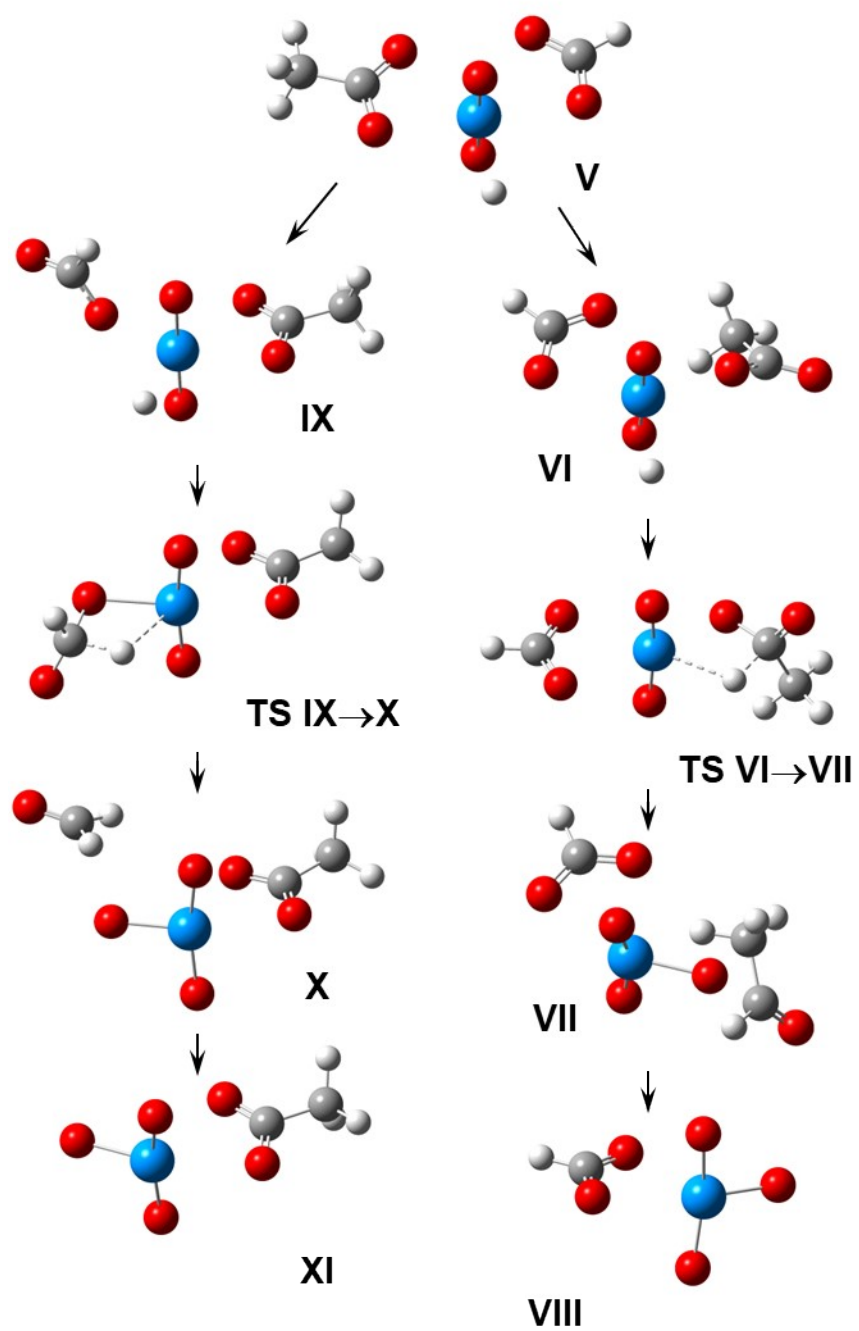

Figure S12

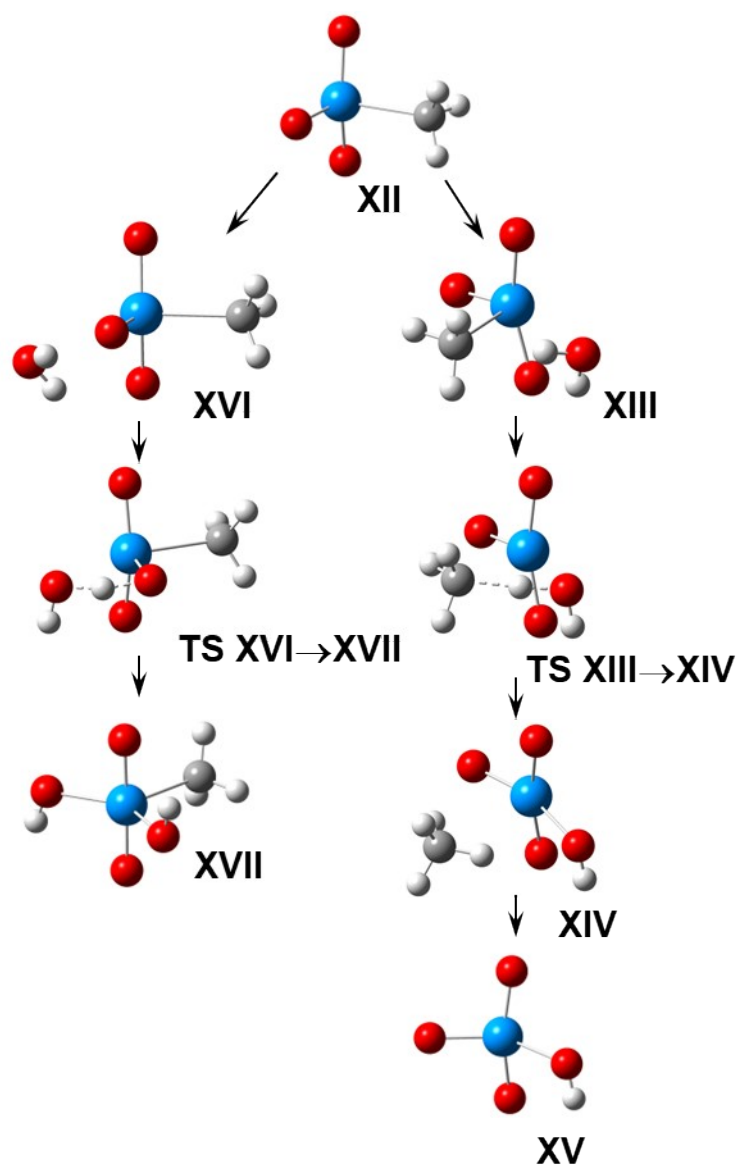

Figure S13.

Table S1.

| Structure    | Zero-point corrected electronic energy | Thermally corrected free energy |
|--------------|----------------------------------------|---------------------------------|
| I            | -1004.615232                           | -1004.654507                    |
| II           | -1004.604059                           | -1004.644649                    |
| TS II->III   | -1004.565179                           | -1004.604376                    |
| III          | -1004.574499                           | -1004.615464                    |
| IV           | -890.057297                            | -890.092941                     |
| formaldehyde | -114.502636                            | -114.524283                     |

Table S2.

| Structure        | Zero-point corrected electronic energy | Thermally corrected free energy |
|------------------|----------------------------------------|---------------------------------|
| I-ac             | -1083.221641                           | -1083.264912                    |
| II-ac            | -1083.209669                           | -1083.254063                    |
| TS II-ac->III-ac | -1083.1684                             | -1083.211674                    |
| III-ac           | -1083.186513                           | -1083.232462                    |
| IV-ac            | -929.359691                            | -929.397871                     |
| acetaldehyde     | -153.810131                            | -153.835063                     |

Table S3.

| Structure    | Zero-point corrected electronic energy | Thermally corrected free energy |
|--------------|----------------------------------------|---------------------------------|
| V            | -1043.918513                           | -1043.961161                    |
| VI           | -1043.906032                           | -1043.947874                    |
| TS VI->VII   | -1043.864826                           | -1043.905718                    |
| VII          | -1043.884324                           | -1043.929082                    |
| VIII         | -890.057297                            | -890.092941                     |
| acetaldehyde | -153.810131                            | -153.835063                     |
| IX           | -1043.907696                           | -1043.950918                    |
| TS IX->X     | -1043.868536                           | -1043.910748                    |
| X            | -1043.877684                           | -1043.922421                    |
| XI           | -929.359691                            | -929.397871                     |
| formaldehyde | -114.502636                            | -114.524283                     |

Table S4.

| Structure        | Zero-point corrected electronic energy | Thermally corrected free energy |
|------------------|----------------------------------------|---------------------------------|
| XII              | -740.656324                            | -740.690521                     |
| H <sub>2</sub> O | -76.423266                             | -76.440903                      |
| XIII             | -817.101013                            | -817.138227                     |
| TSXI II->XIV     | -817.100974                            | -817.137112                     |
| XIV              | -817.145404                            | -817.184582                     |
| V                | -776.660695                            | -776.694344                     |
| CH <sub>4</sub>  | -40.480523                             | -40.497825                      |
| XVI              | -817.101055                            | -817.138367                     |
| TSXVI->XVII      | -817.094361                            | -817.130389                     |
| XVII             | -817.143981                            | -817.180702                     |
